# Supplementary material for: Could the Decision of Trial Participation Precede the Informed Consent Process? Evidence From Burkina Faso
Source: PubMed Central journal article supplement (PMC3829938; doi:10.1371/journal.pone.0080800), 2013-11-15
Supplement: pone.0080800.s001.pdf [file pone.0080800.s001.pdf]

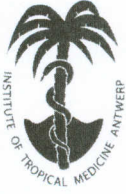

**Prins Leopold Instituut voor Tropische Geneeskunde**  
**Institut de Médecine Tropicale Prince Léopold**  
**Prince Leopold Institute of Tropical Medicine**  
**Instituto de Medicina Tropical Príncipe Leopoldo**

Stichting van openbaar nut | BE-410.057.701

---

Dr. A. Erhart  
Department of Parasitology

IRB/AB/ac/089

8 June 2011

Dear Colleagues,

**Re:                   Mixed-methods study on clinical trial participation and the informed consent process in vulnerable populations**

**Our ref:           11 21 5 774**

I am pleased to inform you that the IRB has approved the protocol of the above mentioned study during its meeting of 7 June.

The protocol does not need to be submitted to the EC of UZA.

Kind regards,

Prof. Anne Buvé  
Chairperson IRB a.i

---

Anne Buvé – Chairperson Institutional Review Board  
Institute of Tropical Medicine Antwerp  
Nationalestraat 155, 2000 Antwerpen - Belgium  
Tel: +32 3 247 65 33     abuve@itg.be

Ann Caron – Secretariat Institutional Review Board  
Institute of Tropical Medicine Antwerp  
Nationalestraat 155, 2000 Antwerpen - Belgium  
Tel: +32 3 247 07 28     acaron@itg.be

|                                                            |                                                                                                                       |
|------------------------------------------------------------|-----------------------------------------------------------------------------------------------------------------------|
| <b>IRB number :</b>                                        | <b>11 21 5 774</b>                                                                                                    |
| <b>Title project/study:</b>                                | <b>Mixed-methods study on clinical trial participation and the informed consent process in vulnerable populations</b> |
| <b>Investigator:</b>                                       | <b>Dr. A. Erhart<br/>Departement Parasitologie</b>                                                                    |
| Background and study objectives (rationale and relevance): | No problem.                                                                                                           |
| Approach for the recruitment of the study subjects:        | Not detailed for this quantitative part.                                                                              |
| Study costs:                                               |                                                                                                                       |
| Study procedures:                                          | Sampling not provided.                                                                                                |
| Risk evaluation:                                           | OK                                                                                                                    |
| Benefit evaluation:                                        | OK                                                                                                                    |
| Confidentiality and privacy:                               | OK                                                                                                                    |
| Informed consent:                                          |                                                                                                                       |
| - language                                                 | Ok                                                                                                                    |
| - description of the content of the study                  | Ok                                                                                                                    |
| - foreseeable risks & benefits                             | Ok                                                                                                                    |
| - confidentiality                                          | Ok                                                                                                                    |
| - privacy                                                  | NA                                                                                                                    |
| - medical treatment                                        | OK                                                                                                                    |
| - contact information                                      | OK                                                                                                                    |
| - voluntary participation & refusal                        | NA                                                                                                                    |
| - legal representative                                     |                                                                                                                       |
| Final remarks:                                             |                                                                                                                       |
| <b>Conclusion</b>                                          | <b>Favourable (= IRB approval). The study does not need to be submitted to the EC of UZA.</b>                         |

Anne Buvé – Chairperson Institutional Review Board  
Institute of Tropical Medicine Antwerp  
Nationalestraat 155, 2000 Antwerpen - Belgium  
Tel: +32 3 247 65 33 abuve@itg.be

Ann Caron – Secretariat Institutional Review Board  
Institute of Tropical Medicine Antwerp  
Nationalestraat 155, 2000 Antwerpen - Belgium  
Tel: +32 3 247 07 28 acar@itg.be
