# Supplementary material for: Could the Decision of Trial Participation Precede the Informed Consent Process? Evidence From Burkina Faso
Source: PubMed Central journal article supplement (PMC3829938; doi:10.1371/journal.pone.0080800), 2013-11-15
Supplement: pone.0080800.s002.pdf [file pone.0080800.s002.pdf]

N/Réf. A10-2010/CE-CM

Bobo-Dioulasso, le 23 mars 2010

## Avis d'examen d'un Projet de Recherche

**1. Numéro d'enregistrement du projet de recherche :**

10-2010/CE-CM

**2. Intitulé du Projet de recherche :**

« Etude sur le processus du consentement éclairé dans un contexte de vulnérabilité des populations »

**Titre en Anglais :** « Multi-methods study on clinical trial participation and the informed consent process in vulnerable populations »

**3. Investigateur Principal**

Mme PARE/TOE Léa

**4. Avis du Comité d'Ethique**

Avis favorable du Comité d'Ethique à l'exécution du projet mais sous réserve de la prise en compte des amendements figurant sur le rapport de la réunion.

**5. Durée de validité :**

1 an à partir de la date d'approbation

**6. Liste des membres présents :**

1. Dr. Germain TRAORE
2. Dr. Rasmané BEOGO
3. Dr. ZINGUE Dezemon
4. Mme ZAMPA Hato Odile
5. Mr SANFO Dramane

Pour Le Président P/O

Dr. ZINGUE Dezemon
